# Supplementary material
Source: Oxford University Press journal article supplement (doi:10.1093/g3journal_jkab327)

**A** Male-production rate (early period)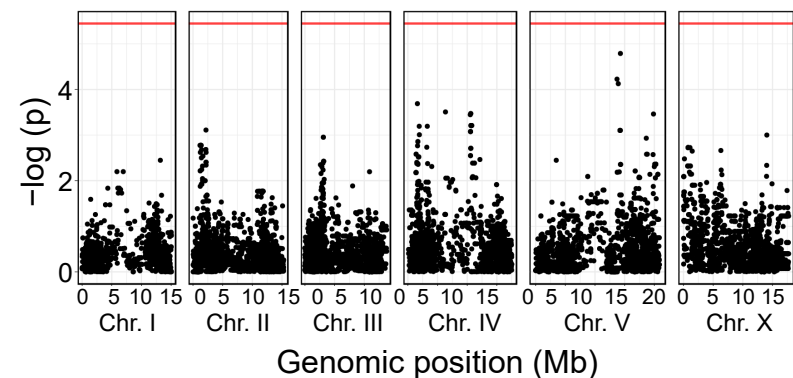**B** Brood size (late period)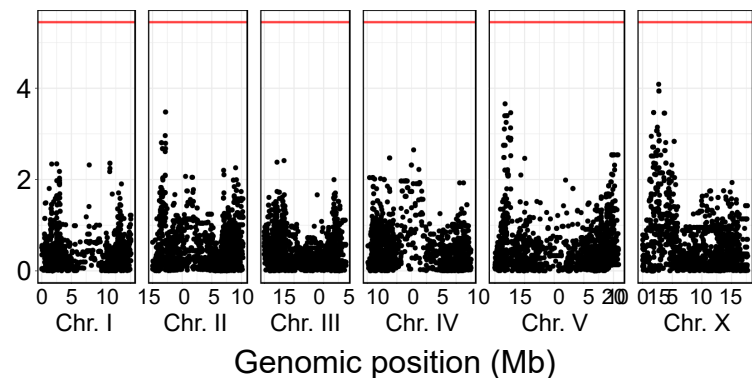**C** Brood size (early period)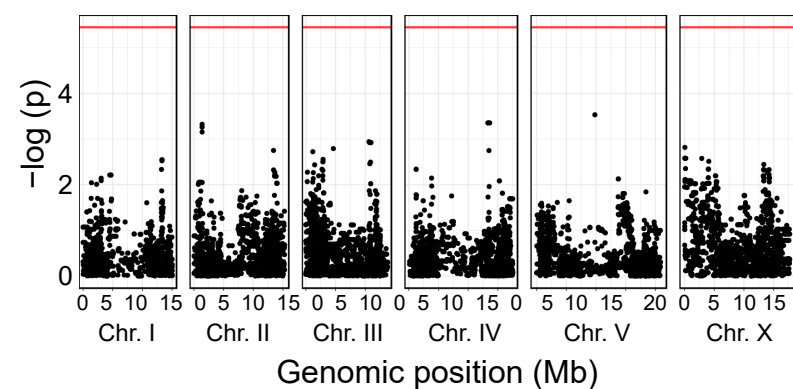**D** Brood size (total period)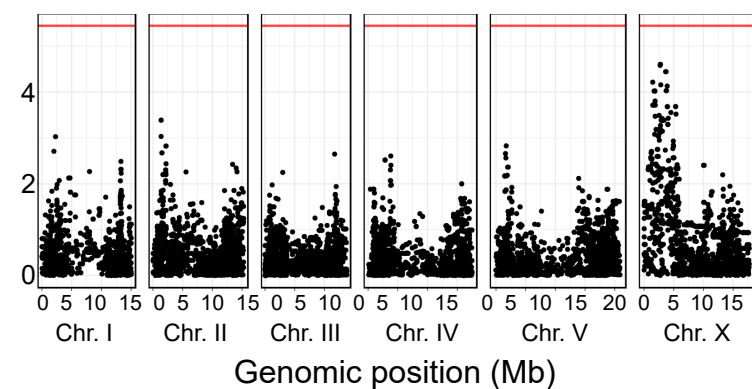**E** Male-production rate (change)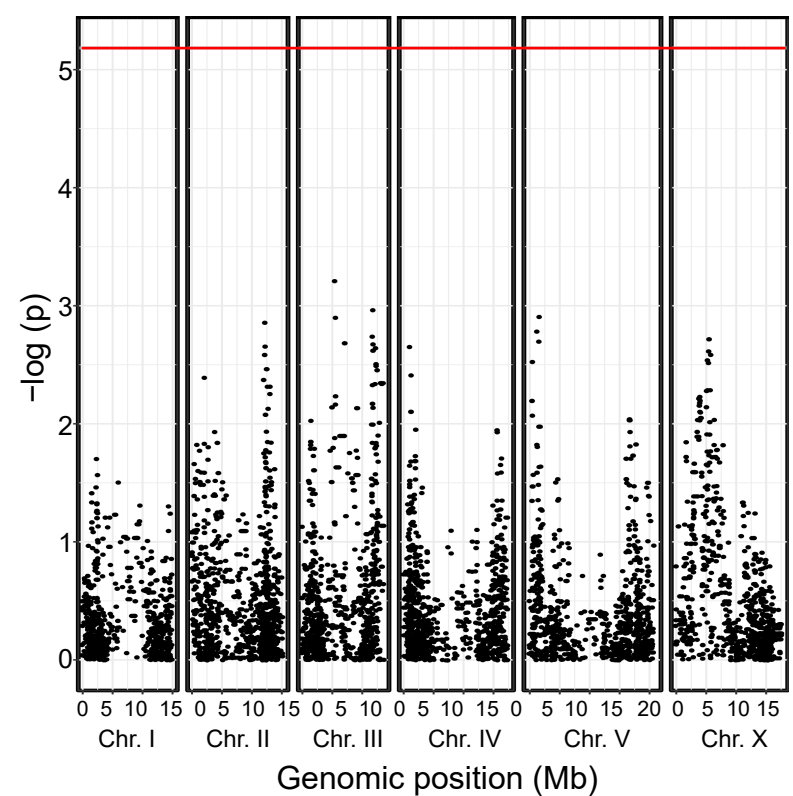**F** Brood size (change)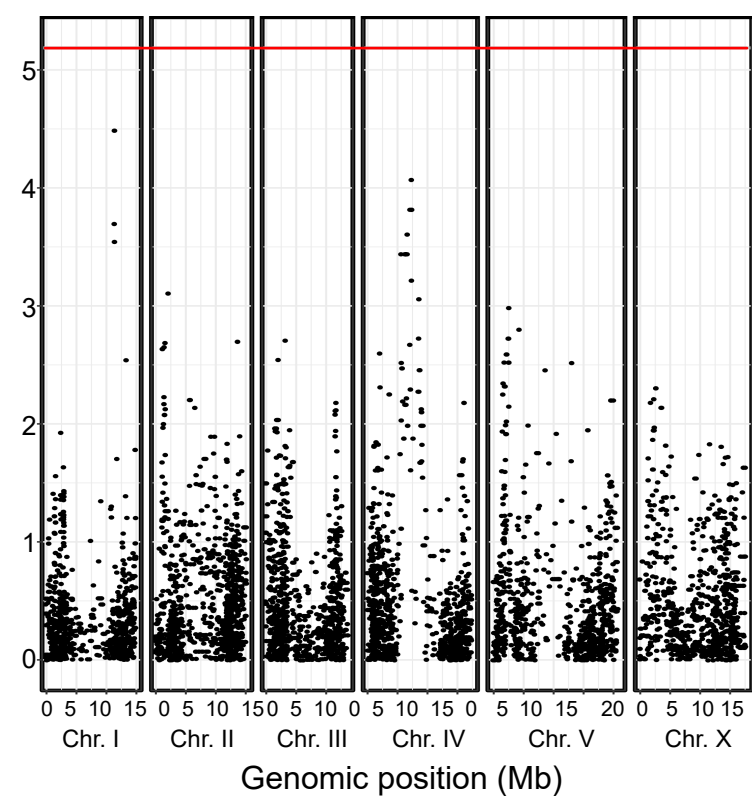

Supplement: jkab327_supplementary_data.zip [file jkab327_supplementary_data.zip]
