# Supplementary material
Source: Oxford University Press journal article supplement (doi:10.1093/g3journal_jkab327)
Supplement: jkab327_supplementary_data.zip [file jkab327_supplementary_data.zip]

**Total period**

**Early period**

**Late period**

4 virgin  
hermaphrodites

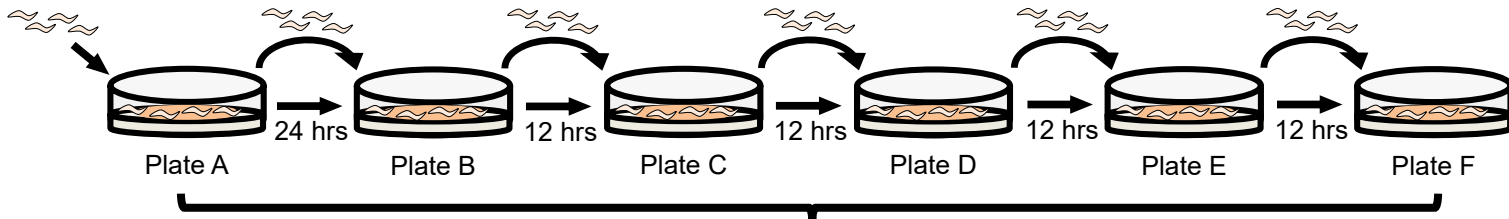

× 3 plates × 5 replicates 96 wild isolates, 20°C

Measuring the number of  
total worms and males

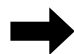

-Brood size  
-Male production rate
