# Supplementary material
Source: Oxford University Press journal article supplement (doi:10.1093/g3journal_jkab327)

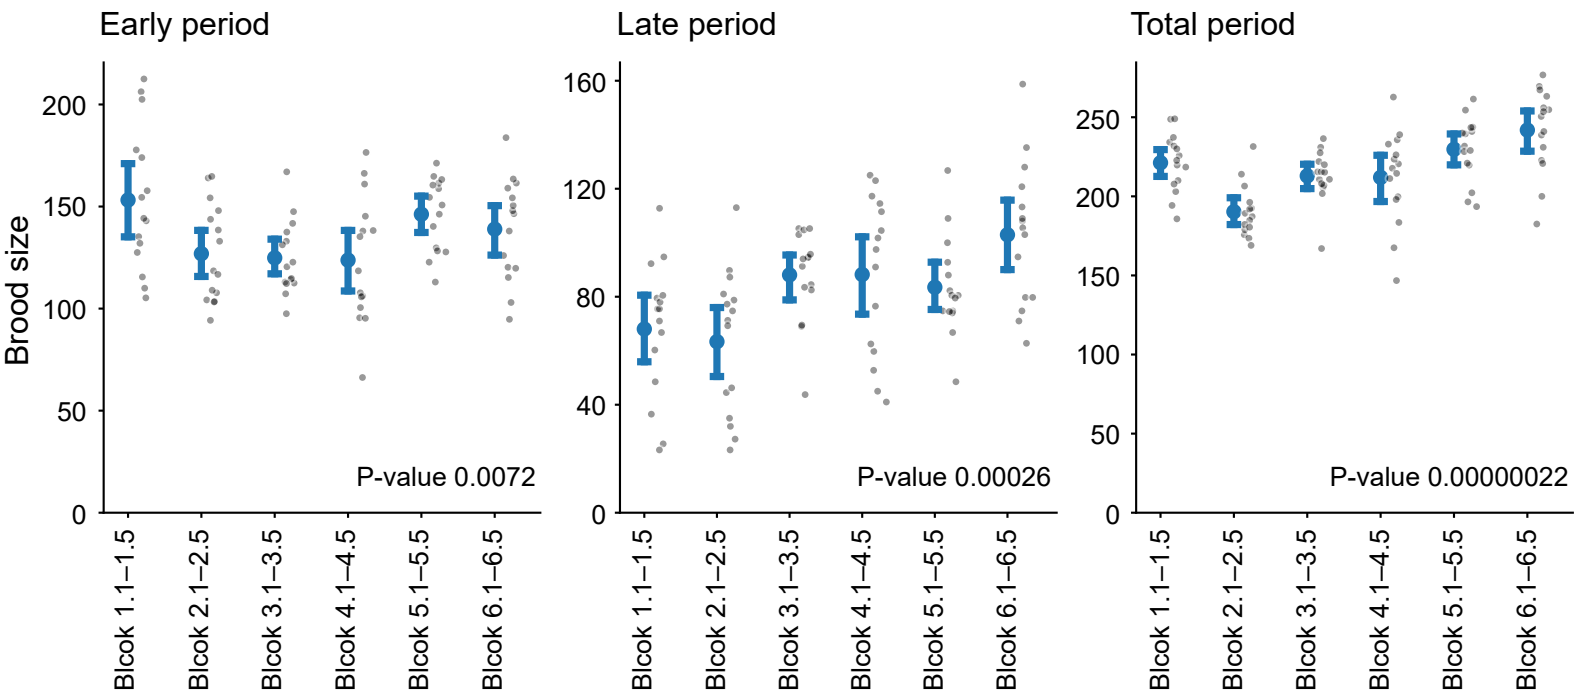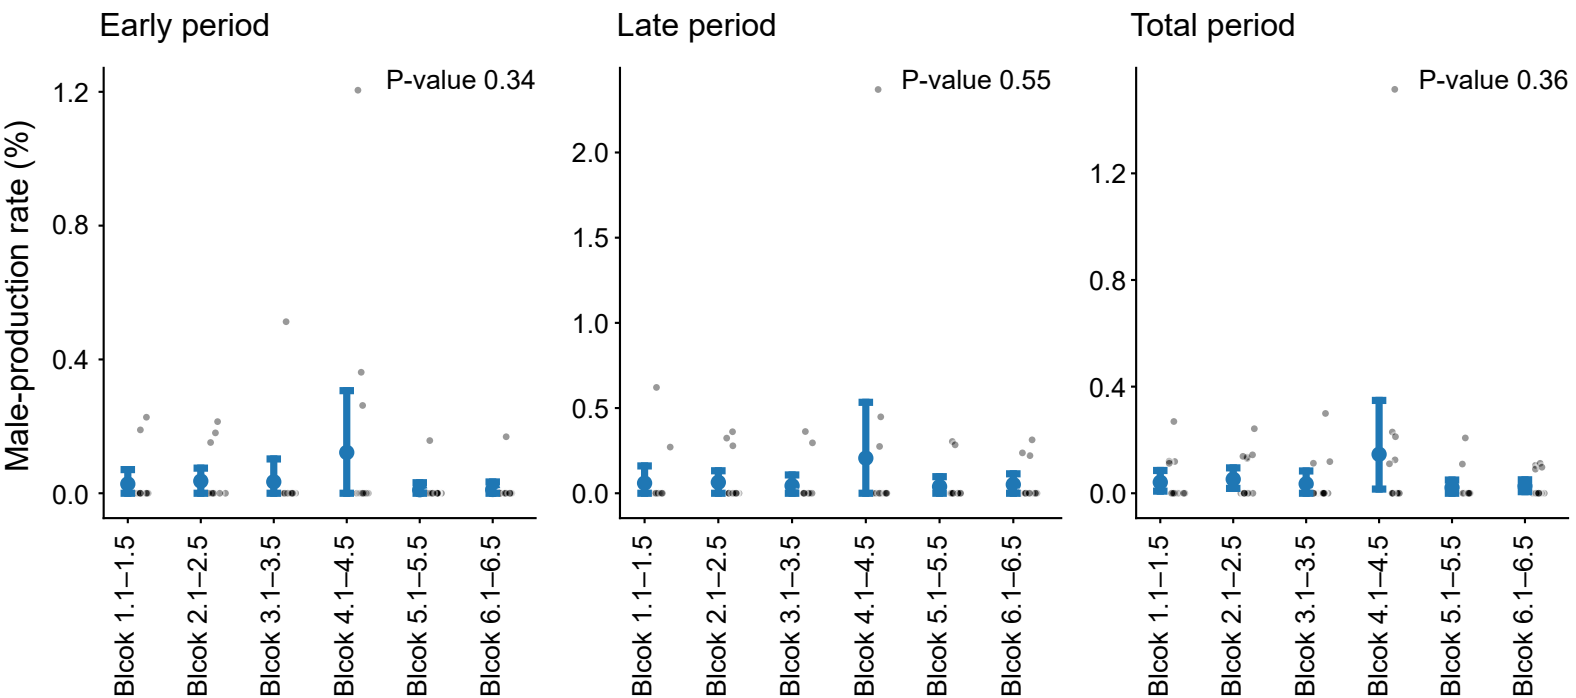

Supplement: jkab327_supplementary_data.zip [file jkab327_supplementary_data.zip]

**A**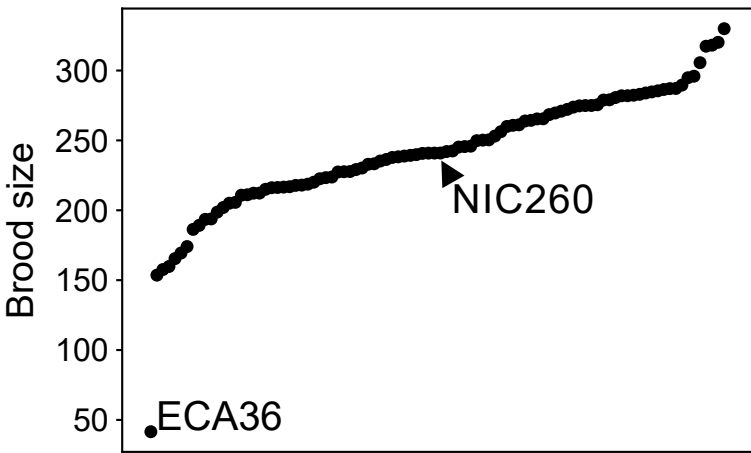**B**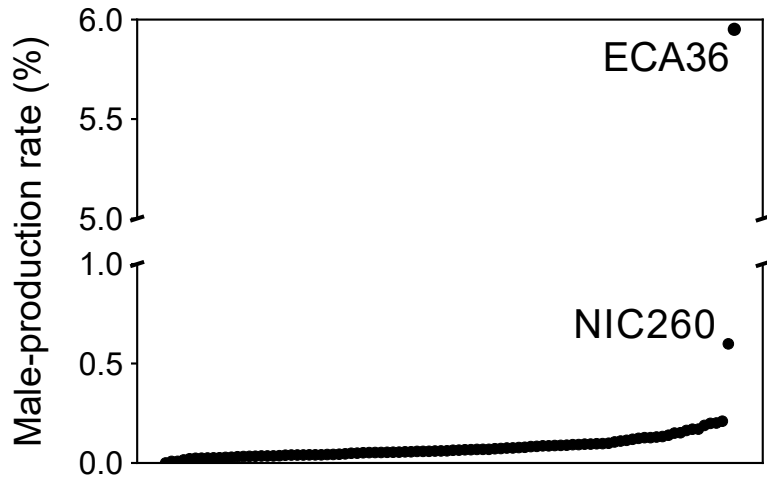

Supplement: jkab327_supplementary_data.zip [file jkab327_supplementary_data.zip]
